# Supplementary material
Source: PubMed Central journal article supplement (PMC3584869)
Supplement: IAI.00969-12_zii999090022so1.pdf [file IAI.00969-12_zii999090022so1.pdf]

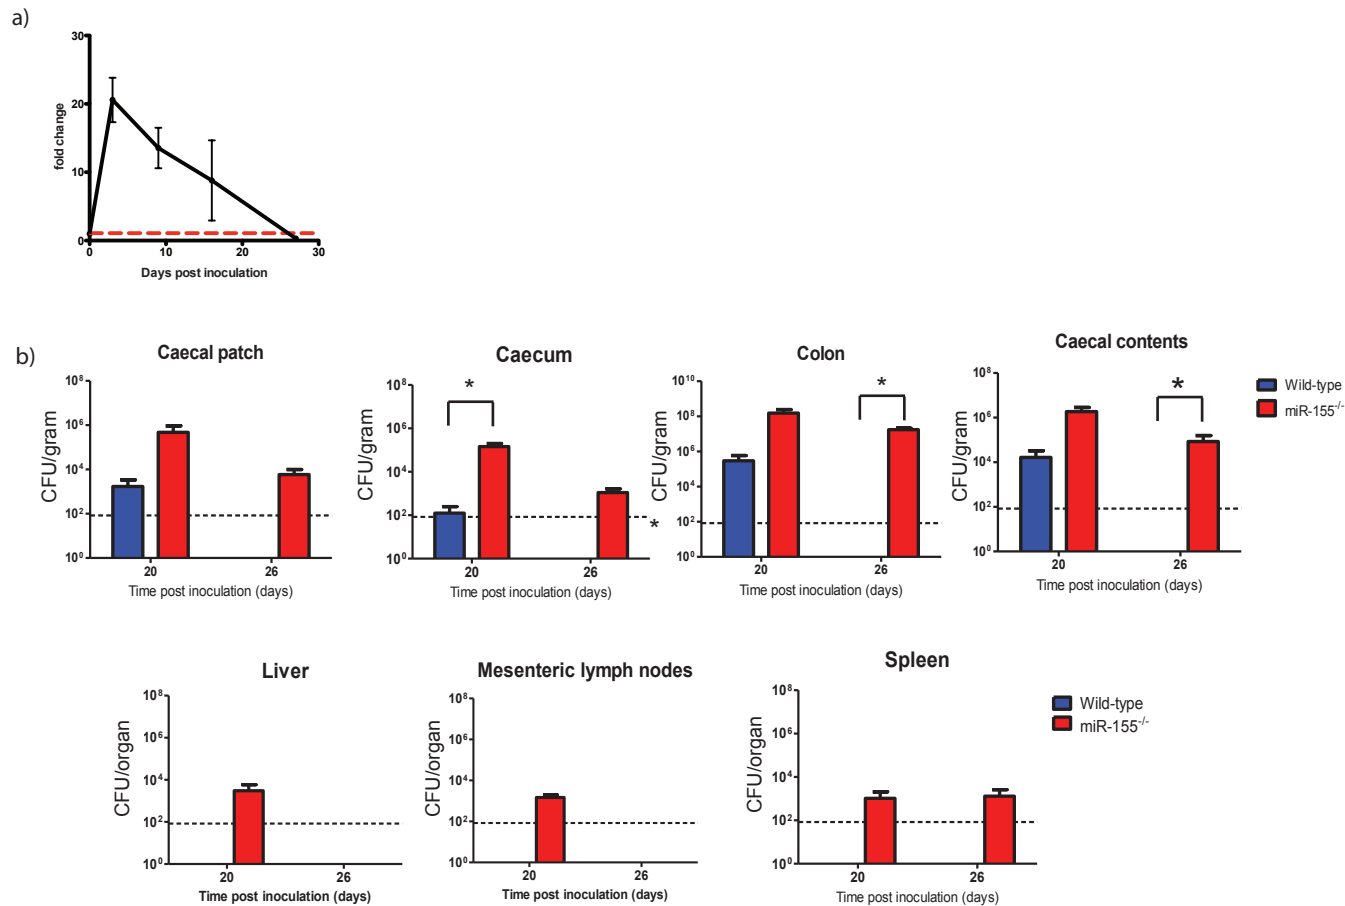

Supplementary figure 1. (a) Real-Time quantitative Reverse Transcription PCR (qRT-PCR) analysis of miR-155 in colonic tissue from wild type mice infected with *C. rodentium*. RNA was extracted from colonic tissue of 3 mice on day 0, 3, 9 and 16 pc. Expression was normalized against GAPDH. The fold change in gene expression between the average expression on day 0 and the time points post challenge is plotted ( $\pm$ SEM). (b) Enumeration of *C. rodentium* from the organs of infected miR-155 deficient and wild-type mice at day 20 and 26 post challenge ( $\pm$ SEM), n=5 mice per group. \* indicates P value < 0.05 by student t test.
