# Supplementary material
Source: PubMed Central journal article supplement (PMC3584869)
Supplement: IAI.00969-12_zii999090022so2.pdf [file IAI.00969-12_zii999090022so2.pdf]

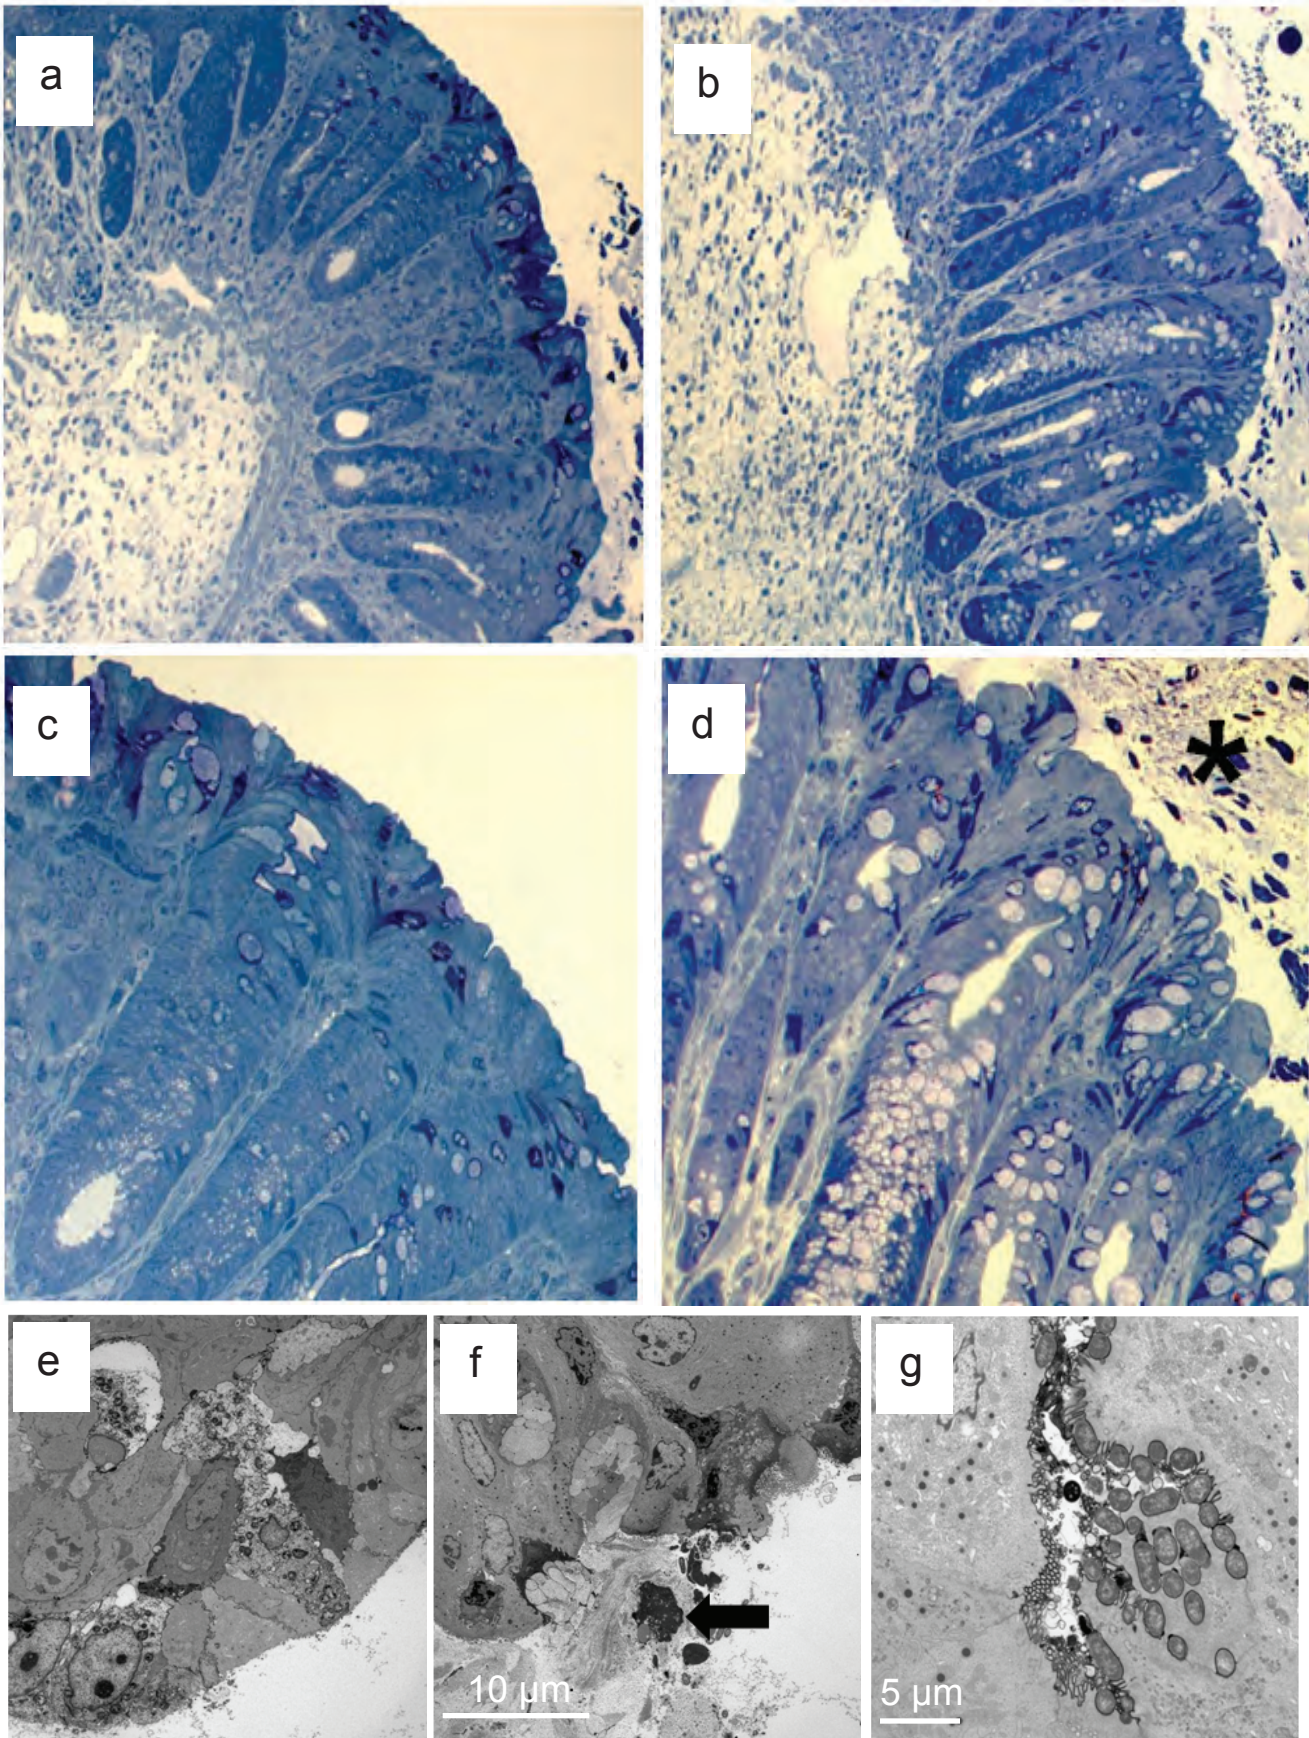

Supplementary figure 2. *C. rodentium*-infected colonic tissue from miR-155 deficient mice and control wild-type mice stained with toluidine blue and imaged by light microscopy (a-d), and TEM (e-g). Toluidine blue staining: wild-type tissue (a and c) and tissue from miR-155 deficient mice (b and d) at 40x and 63x magnification respectively. The star indicates cells located in the lumen of the colon. TEM: (e) wild-type and (f and g) miR-155 deficient colon tissue. In (f) arrow indicates a neutrophil in the luminal compartment. (g) bacteria penetrating the tissue surface.
