# Supplementary material
Source: PubMed Central journal article supplement (PMC3584869)
Supplement: IAI.00969-12_zii999090022so3.pdf [file IAI.00969-12_zii999090022so3.pdf]

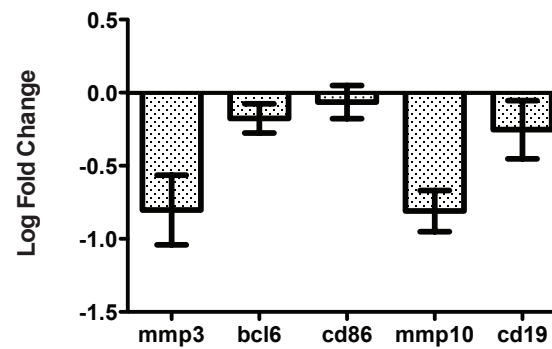

Supplementary figure 3. Real-Time quantitative Reverse Transcription PCR (qRT-PCR) analysis in caecal patch tissue of five genes selected from those differentially expressed in miR-155 deficient mice by microarray analysis. RNA was extracted from caecal patch tissue of 5 mice on 4 days pc. Expression was normalized against GADPH. The fold change in gene expression between the average expression in wild-type and average expression in miR-155 deficient mice is plotted for each of the five genes ( $\pm$ SEM).
